# Supplementary material for: Study on Influencing Parameters of Total Phosphorus Degradation in Cattle Farm Wastewater by Electrocoagulation Using Magnesium, Aluminum, and Iron Electrodes
Source: MDPI journal article supplement (doi:10.3390/w15234134), 2023-11-29
Supplement: s1 [file s1]

## **Supplemental files**

Table S 1. The average Range analysis of TP removal by Mg.

Table S 2. The average Range analysis of TP removal by Al. Table S 2. The  
average Range analysis of TP removal by Al

Table S 3. The average Range analysis of TP removal by Fe.

Table S 4. The average Range analysis of anode consumption by Mg.

Table S 5. The average Range analysis of anode consumption by Al.

Table S 6. The average Range analysis of anode consumption by Fe.

Table S 7. Kinetic analysis of the effect of electrode spacing on TP  
removal

**Table S 1.** The average Range analysis of TP removal by Mg

| level | ED    | pH    | Voltage |
|-------|-------|-------|---------|
| 1     | 88.91 | 80.71 | 74.50   |
| 2     | 85.59 | 82.09 | 80.02   |
| 3     | 80.95 | 85.23 | 85.86   |
| 4     | 73.98 | 81.41 | 89.05   |
| rang  | 14.93 | 4.52  | 14.55   |
| rank  | 1     | 3     | 2       |

**Table S 2.** The average Range analysis of TP removal by Al

| level | ED    | pH    | Voltage |
|-------|-------|-------|---------|
| 1     | 84.17 | 78.25 | 47.92   |
| 2     | 79.77 | 72.88 | 64.03   |
| 3     | 67.90 | 60.20 | 77.37   |
| 4     | 43.52 | 64.02 | 86.01   |
| rang  | 40.65 | 18.04 | 38.09   |
| rank  | 1     | 3     | 2       |

**Table S 3.** The average Range analysis of TP removal by Fe

| level | ED    | pH    | Voltage |
|-------|-------|-------|---------|
| 1     | 33.25 | 21.4  | 17.22   |
| 2     | 28.42 | 25.20 | 21.91   |
| 3     | 23.08 | 27.55 | 29.25   |
| 4     | 16.19 | 26.79 | 32.56   |
| rang  | 17.07 | 6.15  | 15.34   |
| rank  | 1     | 3     | 2       |

“Delta” was the maximum average for each level of each factor minus minimum average. The lager of delta, the higher the rank.

**Table S 4.** The average Range analysis of anode consumption by Mg

| level      | ED   | pH   | Voltage |
|------------|------|------|---------|
| 1          | 8.41 | 3.70 | 1.91    |
| 2          | 3.28 | 4.38 | 3.93    |
| 3          | 3.31 | 4.17 | 4.51    |
| 4          | 2.16 | 4.91 | 6.81    |
| rang value | 6.25 | 1.20 | 4.90    |
| rank       | 1    | 3    | 2       |

**Table S 5.** The average Range analysis of anode consumption by Al

| level      | ED   | pH   | Voltage |
|------------|------|------|---------|
| 1          | 5.32 | 1.88 | 1.03    |
| 2          | 2.17 | 2.23 | 2.00    |
| 3          | 1.53 | 3.08 | 3.25    |
| 4          | 1.10 | 2.94 | 3.85    |
| rang value | 4.22 | 1.20 | 2.82    |
| rank       | 1    | 3    | 2       |

**Table S 6.** The average Range analysis of anode consumption by Fe

| level      | ED   | pH   | Voltage |
|------------|------|------|---------|
| 1          | 9.04 | 4.85 | 2.46    |
| 2          | 4.05 | 4.82 | 4.39    |
| 3          | 4.04 | 4.39 | 6.14    |
| 4          | 2.62 | 5.70 | 6.77    |
| rang value | 6.42 | 1.31 | 4.31    |
| rank       | 1    | 3    | 2       |

**Table S 7.** Kinetic analysis of the effect of electrode spacing on TP removal

| Kinetic model | Mg       | Al        | Fe        |
|---------------|----------|-----------|-----------|
| First order   | K1=0.066 | K1=0.0564 | K1=0.0085 |
|               | R2=0.892 | R2=0.956  | R2=0.976  |
| Second order  | K2=0.027 | K1=0.0036 | K1=0.0001 |
|               | R2=0.989 | R2=0.944  | R2=0.983  |
